# Supplementary material for: Multisite long-read sequencing reveals the early contributions of somatic structural variations to HBV-related hepatocellular carcinoma tumorigenesis
Source: HighWire-hosted journal article supplement (doi:10.1101/gr.279617.124), 2025-03-04
Supplement: Supplemental_Tables.xlsx [file Supplemental_Tables.xlsx]

## Sheet: Table S1
Table S1. Summary of clinical information
ID	HCC8	HCC9	HCC10	HCC12	HCC13
Sex	female	male	male	male	male
Age	77	38	75	65	54
tumor_size	6.7	12	4,6.6	6.5	13
number_of_tumors	1	1	2	1	1
differentiation	G1	G2	G2	G2	G2
primary_tumor	yes	yes	yes	yes	yes
AFP(ng/ml)	2.94	76.3	4.32	5.65	7
PIVKA(mAU/ml)	7994	31987	2890	492	26428
Alcohol consumption	0	ccasional light drinking	0	0	0
Smoking history	0	Smoking for 10 years, 10 cigarettes per day.	0	0	Smoking for 10 years, 10 cigarettes per day.
preoperative chemotherapy	0	0	0	0	0
preoperative radiotherapy	0	0	0	0	0
Targeted therapy	0	0	0	0	0
Immunotherapy	0	0	0	0	0

## Sheet: Table S2
Table S2. Summary of ONT data quality.
sample id	number of reads	N50 length	coverage	average quality	>Q10	>Q20
HCC8_WBC	6005147	20490	25.3438	11.6	0.793	0.006
HCC8_N1	9505219	22961	36.3322	11.7	0.809	0.009
HCC8_N3	9038959	26305	35.8162	11.4	0.76	0.008
HCC8_T1	10454127	21645	36.8517	11.6	0.8	0.007
HCC8_T2	6772781	26105	35.5789	11.5	0.802	0.004
HCC8_T3	7377172	26916	37.6219	11.4	0.778	0.005
HCC8_T4	6065185	21895	33.0572	11.5	0.78	0.009
HCC8_T5	6848516	26118	38.3676	11.8	0.832	0.009
HCC9_WBC	4679720	21502	21.747	11.7	0.808	0.008
HCC9_N1	7333986	24437	36.487	12	0.851	0.016
HCC9_N3	7938121	20121	33.6881	11.6	0.796	0.008
HCC9_T1	8334106	27772	33.1769	11.7	0.806	0.015
HCC9_T2	5624509	20755	30.616	11.4	0.764	0.009
HCC9_T3	7826052	22506	33.6236	11.4	0.764	0.005
HCC9_T4	8848480	31020	42.1263	11.8	0.844	0.008
HCC9_T5	6134705	25684	32.4697	11.7	0.806	0.006
HCC10_WBC	4828451	20388	21.0638	11.6	0.796	0.005
HCC10_N1	13036372	21391	44.2235	11.6	0.79	0.011
HCC10_N3	14502303	21208	38.5649	11.8	0.802	0.02
HCC10_N5	5940107	20492	30.4917	11.6	0.802	0.008
HCC10_T1	13582959	21368	41.8403	11.7	0.818	0.01
HCC10_T2	8453798	26854	40.121	11.9	0.826	0.015
HCC10_T3	11524352	22770	38.4153	11.3	0.744	0.006
HCC10_T4	15833353	19216	39.93	11.8	0.839	0.014
HCC10_T5	11840171	23374	42.021	11.4	0.782	0.005
HCC10_T6	13153961	20498	41.4896	11.1	0.736	0.003
HCC10_T7	10104859	22525	36.2784	11.6	0.784	0.012
HCC12_WBC	5479113	20764	22.9558	10.4	0.594	0
HCC12_N1	11672732	20187	35.6078	11.9	0.809	0.026
HCC12_N3	11559877	21328	36.3921	10.5	0.619	0
HCC12_T1	8241759	23354	33.0956	10.9	0.731	0
HCC12_T2	14705185	19690	37.7683	12	0.84	0.029
HCC12_T3	4802522	20367	31.1833	11.9	0.853	0.005
HCC12_T4	12224684	22053	39.6616	11	0.706	0.001
HCC12_T5	8272776	26491	33.4534	11.8	0.817	0.022
HCC13_WBC	5765858	19840	19.8352	12.1	0.874	0.014
HCC13_N1	8255887	19317	40.167	11.6	0.807	0.002
HCC13_T1	6559534	19888	35.2779	11.8	0.808	0.017
HCC13_T2	5053558	20616	33.9526	11.2	0.756	0.002
HCC13_T3	6959048	21360	36.5715	11.4	0.754	0.009
HCC13_T4	7384175	20060	36.1294	11.6	0.744	0.027
HCC13_T5	8203699	19658	40.0174	11.8	0.826	0.006

## Sheet: Table S3
Table S3. Summary of long-read RNA sequencing.
sample id	number of reads	total bases	N50 length	average quality
HCC10_T7	1079264	1033957555	1175	8.9
HCC10_N1	1134450	891551892	1032	8.9
HCC13_T1	2270542	4663569374	3164	12.9
HCC13_N1	2344324	3928383411	2320	13

## Sheet: Table S4
Table S4. Public ONT data used for constructing the PON.
sample_id	cohort
HG002	HPRC_PLUS
HG005	HPRC_PLUS
HG00733	HPRC_PLUS
HG01109	HPRC_PLUS
HG01243	HPRC_PLUS
HG02055	HPRC_PLUS
HG02080	HPRC_PLUS
HG03098	HPRC_PLUS
HG03492	HPRC_PLUS
HG00438	HPRC
HG00621	HPRC
HG00673	HPRC
HG00735	HPRC
HG00741	HPRC
HG01071	HPRC
HG01106	HPRC
HG01123	HPRC
HG01175	HPRC
HG01258	HPRC
HG01358	HPRC
HG01361	HPRC
HG01891	HPRC
HG01928	HPRC
HG01952	HPRC
HG01978	HPRC
HG02148	HPRC
HG02257	HPRC
HG02486	HPRC
HG02559	HPRC
HG02572	HPRC
HG02622	HPRC
HG02630	HPRC
HG02717	HPRC
HG02886	HPRC
HG03453	HPRC
HG03471	HPRC
HG03516	HPRC
HG03540	HPRC
HG03579	HPRC
HG02015	HPRC
HG02129	HPRC
HG02056	HPRC
HG03195	HPRC
HG04187	HPRC
HG02683	HPRC
HG01960	HPRC
HG01530	HPRC
HG04184	HPRC
HG02391	HPRC
HG03834	HPRC
HG02258	HPRC
HG02647	HPRC
HG01252	HPRC
HG02451	HPRC
HG02668	HPRC
HG01192	HPRC
HG00099	HPRC
HG03742	HPRC
HG01884	HPRC
HG00280	HPRC
HG03139	HPRC
HG03942	HPRC
HG01969	HPRC
SRR15966373	https://doi.org/10.1016/j.cell.2022.06.032
SRR15966374	https://doi.org/10.1016/j.cell.2022.06.032
SRR15966405	https://doi.org/10.1016/j.cell.2022.06.032
SRR15966406	https://doi.org/10.1016/j.cell.2022.06.032
SRR15966407	https://doi.org/10.1016/j.cell.2022.06.032

## Sheet: Table S5
Table S5. Summary of Oligos
Oligos for constructing full-length cDNA library
Oligos	Sequence(5’→3’)
VNP	/5phos/ACTTGCCTGTCGCTCTATCTTCTTTTTTTTTTTTTTTTTTTTVN
SSP	TTTCTGTTGGTGCTGATATTGCT/i2OMeG//i2OMeG//i2OMeG/
PR2	/5Phos/TTTCTGTTGGTGCTGATATTGC
Oligos for qPCR
Name	F(5’→3’)	R(5’→3’)
qPCR-1(NRG1)	CTCCTCTCTCAGATTCAAGTGGT	TGCGAAGTTCTGACTTCCCTG
qPCR-2(NRG1)	GCCCATCACTCCACTACTGT	AGGGCCTCCTGTGCCATTA
qPCR-3(NRG1)	CTGACCATAACCGGCATCTG	AGACGGTCATGCAGCTTTTTC
EVA1C	GCAGCCACCACCTTCCAG	AGCACCTTCGGGATAGGACT
KLHDC7B	TGCCTGTACAGCATGGAGTG	TCGTCCCAAGCATCCTTCAC
KLHDC7B-DT	TTTTGCCCGTTTTGATCCCA	CCAGGAGCGCGAATTTCTCT
β-actin	CACCAACTGGGACGACAT	ACAGCCTGGATAGCAACG
Oligos for obtain full-length cDNA
oligo-dT	ACGAGCATCAGCAGCATACGANNNNNNNNTTTTTTTTTTTTTTTTTTTTTTTTTTTTTTVN
template-switching oligo	AGAGACAGATTGCGCAATGNNNNNNNN/i2OMeG//i2OMeG//i2OMeG/
Oligos for fusion
Name	F(5’→3’)	R(5’→3’)
Fusion	TGGCTTGCCACAGGTTATGT	ACACCTCCTTTCCATGGCTG
